1 **Title:** Conservation status, threats, and information needs of small mammals in Alaska

2

3 **Authors:** A. Droghini<sup>1</sup>, K. S. Christie<sup>2</sup>, R. R. Kelty<sup>1</sup>, P. Schuette<sup>3</sup>, T. A. Gotthardt<sup>2</sup>

4

5 **Affiliations:** 1. Alaska Center for Conservation Science, University of Alaska Anchorage, 3211

6 Providence Drive, Anchorage, Alaska 99508. 2. Alaska Department of Fish and Game,

7 Threatened, Endangered, and Diversity Program, 333 Raspberry Road, Anchorage, Alaska, 99518.

8 3. Marine Mammals Management, US Fish and Wildlife Service, 1011 East Tudor Road,

9 Anchorage, Alaska 99503.

10

11 **Corresponding author:** A. Droghini, email: [adroghini@alaska.edu](mailto:adroghini@alaska.edu)

12

13 **Keywords:** conservation ranks, conservation prioritization, data deficient species, endemic

14 species, extinction risk, *Sorex pribilofensis*, threatened species, threat status

## 15 **ABSTRACT**

16           Despite their diversity and ecological importance, small mammals are under-represented  
17 in conservation research relative to other mammals. We evaluated the conservation status of 36  
18 small mammal species in Alaska, U.S.A. using a ranking system that we previously developed,  
19 the Alaska Species Ranking System (ASRS). We compared results from the ASRS with  
20 NatureServe's subnational rankings. Finally, we surveyed taxonomic experts to identify  
21 recommended conservation actions and research priorities for 5 species of high conservation  
22 concern. In general, the ASRS and NatureServe agreed on the rankings of species in the highest  
23 and lowest risk categories. Species of highest conservation concern were taxa endemic to the state,  
24 including 2 island-endemic shrews, and taxa from the orders Chiroptera and Eulipotyphla. Because  
25 the ASRS includes information needs in its assessment, 15 of the 20 species considered lowest  
26 concern by NatureServe were considered intermediate concern by the ASRS. In the ASRS, most  
27 species ( $n = 24$ ) were assessed to have low biological vulnerabilities, but high information needs.  
28 Population size and trends were unknown for all species; distributional limits and understanding  
29 of population dynamics were incomplete for all species except 4. Disease and climate change  
30 effects on habitat were perceived as important threats, but affected only 8 species. Taxonomic  
31 experts identified addressing data deficiencies and protecting habitat as important conservation  
32 actions; they identified monitoring population trends, modeling habitat, and researching species'  
33 genetic diversity and adaptive capacity as high priorities. Conservation assessments that require  
34 accurate and current data on population trends or threats may lead to bias against data deficient  
35 groups such as small mammals. Our findings demonstrate the importance of accounting for data  
36 deficiencies in conservation status ranks to avoid conflation of sparse information with low  
37 conservation concern.

## 38 INTRODUCTION

39 Conservation practitioners and natural resource managers are often tasked with prioritizing  
40 effort and funding for species based on extirpation risk or vulnerability to threats. To aid with  
41 prioritization, practitioners often use ranking systems, such as those developed by the International  
42 Union for the Conservation of Nature (IUCN) or NatureServe. Conservation ranking systems  
43 assign a status to a species by evaluating and scoring that species across a set of criteria (IUCN  
44 2012; Master et al. 2012). Scoring criteria requires data that are accurate, current, and available.  
45 When data are scarce or absent, species may receive a special status (e.g., data-deficient for the  
46 IUCN or unrankable for NatureServe). In less extreme cases, assessors can score some questions  
47 as unknown or select a range of answers to express uncertainty (IUCN 2012; Master et al. 2012).  
48 Designations of uncertainty allow assessors to assign conservation status to species that lack the  
49 data necessary to reliably score a subset of criteria; however, ranking systems can assign low-risk  
50 status to species with unknown population trends or threats if designations of uncertainty have no  
51 influence on the rank calculation. Data deficient species present challenges to conservation  
52 practitioners because the funding necessary to address data gaps can be difficult to justify for  
53 species with low-risk status as compared with species ranked as at-risk because of more complete  
54 or accurate data (Jetz and Freckleton 2015).

55 Small mammals (Chiroptera, Eulipotyphla, Rodentia, Lagomorpha) compose over 75% of  
56 the Earth's extant mammalian diversity and function as primary consumers, insectivores, vectors  
57 of disease, and focal prey species (Ceballos & Brown 1995; Entwistle & Stephenson 2000).  
58 Despite their diversity and ecological importance, limited knowledge of population sizes,  
59 population and distribution trends, and threats often precludes assessment of their conservation  
60 status using traditional ranking systems. Under the IUCN ranking system, 16% of Rodentia species

61 are listed as data-deficient, compared with 7% of Carnivora species and 4% of Cetartiodactyla  
62 species; however, a model developed by Jetz and Freckleton (2015) predicted more than half of  
63 the data deficient Rodentia species to be threatened. Small mammals are under-represented in  
64 conservation literature and receive less funding than other mammal groups (Entwistle &  
65 Stephenson 2000), likely resulting in the high proportion of small mammal species considered data  
66 deficient. Despite a lack of research attention and funding, most mammal species that have gone  
67 extinct in the past 500 years have been small mammals (Ceballos and Brown 1995). Thus, the  
68 conservation attention afforded to small mammals is indicative of neither their information needs  
69 nor their resilience.

70         The conservation status of species at the global scale does not reflect conservation threats  
71 and vulnerabilities at local scales (Breininger et al. 1998; Hartley and Kunin 2003). Thus, many  
72 jurisdictions develop their own ranking systems (Millsap et al. 1990; Breininger et al. 1998;  
73 Gotthardt et al. 2012). In 2007, the Alaska Department of Fish and Game Threatened, Endangered,  
74 and Diversity Program identified the need for a state-specific ranking system to evaluate the  
75 conservation status of tetrapods in Alaska. It partnered with the state's Natural Heritage Program,  
76 the Alaska Center for Conservation Science (ACCS), to create the Alaska Species Ranking System  
77 (ASRS). The ASRS was modeled after a ranking system developed for the state of Florida (Millsap  
78 et al. 1990) and was modified to be relevant to Alaska's ecological conditions and user needs.

79         Alaska has a unique geography and glacial history that has resulted in the evolutionary  
80 divergence of many taxonomic groups, including small mammal taxa that do not occur anywhere  
81 else in the United States (Cook et al. 2001; Lanier et al. 2015). Unlike other states in the U.S.,  
82 threats from human development are low. However, in recent years, there has been concern about

83 the effects of climate change to habitats, disturbance regimes, and species' assemblages (Tape et  
84 al. 2006; Chapin et al. 2010; Tape et al. 2016).

85 In this paper, we use assessments from 2 conservation ranking systems, the ASRS and  
86 NatureServe, to summarize the status, threats, and data deficiencies of small mammal species in  
87 Alaska. We also elicited expert opinion to identify conservation actions and research priorities. By  
88 synthesizing results from 3 sources, we provide a comprehensive assessment of the conservation  
89 status of nearly all small mammal species found in Alaska.

## 90 **METHODS**

91 From 2017 to 2020, we assessed the conservation status of 36 small mammal species in  
92 Alaska using the ASRS and the NatureServe Conservation Status Assessment. ACCS is part of  
93 the NatureServe network of Natural Heritage Programs and Conservation Data Centers  
94 (<https://www.natureserve.org/>); thus, ACCS is responsible for maintaining sub-national  
95 conservation status ranks for the state of Alaska.

### 96 **The Alaska Species Ranking System**

97 The ASRS was developed in 2007 by ACCS and the Alaska Department of Fish & Game.  
98 Gotthardt et al. (2012) describe the ASRS in detail; we provide a brief summary here. The ASRS  
99 contains 13 multiple-choice questions classified into 3 themes: Trends, Biological Vulnerability,  
100 and Action Needs. The Trends theme comprises 2 questions evaluating change in population and  
101 distribution. The Biological Vulnerability theme characterizes the ecological and biological traits  
102 that correlate with extirpation risk for a species (Gotthardt et al. 2012). The Action Needs theme  
103 measures the strength of management and conservation actions. In this context, conservation  
104 actions evaluate knowledge gained from inventory, monitoring, and research efforts. In

105 combination, the 3 themes effectively assess the risk of regional extirpation of non-endemic  
106 species and extinction of endemic species (collectively referred to as “conservation concern”).

107 Conservation concern increases with numeric value in the ASRS and scores can be positive  
108 or negative. The 2 questions in Trends are evaluated on a 5-point scale ranging from -10 to 10. A  
109 high Trends score indicates currently declining populations or shrinking distributions. Biological  
110 Vulnerability comprises 7 questions, which are evaluated on 3-, 4-, or 5-point scales. Three-point  
111 scales range from -5 to 5; the others range from -10 to 10. A high score for this theme indicates  
112 that the species has several traits (e.g., small population size, restricted range, slow life history, or  
113 high ecological specialization) that make it more vulnerable to extirpation. Finally, Action Needs  
114 comprises 4 questions that are each evaluated on a 3-point scale, which indicate low (-10),  
115 moderate (2), or high needs (10). A high Action Needs score denotes an absence of management  
116 and conservation actions, resulting in large information needs. Scores within themes are summed  
117 to create a theme score. Each theme score is then categorized to create a final, categorical rank.

118 The ASRS categorizes each theme score as high, unknown, or low; score thresholds for  
119 each category are presented in Gotthardt et al. (2012). Categorization results in 9 numerical ranks  
120 ranging from I to IX. Numerical ranks are further grouped into one of 4 color categories: red  
121 (highest conservation concern, numerical ranks I-II), orange (ranks III-V), yellow (ranks VII and  
122 VIII), and blue (ranks VI and IX). Red, Orange, and Yellow indicate high, unknown, or low Trends  
123 scores, respectively. Species in these categories also scored high for one or both of the remaining  
124 themes, Biological Vulnerability and Action Needs. One exception is the rank Orange III, which  
125 indicates a high Trends score but low Biological Vulnerability and Action Needs. Finally, a rank  
126 of Blue indicates low Biological Vulnerability and Action Needs, and either an unknown or low  
127 Trends score.

128           The assessment process for the ASRS begins with a trained assessor conducting a  
129 systematic review, preparing a species' account, and conducting an initial assessment to obtain  
130 preliminary scores (Fig. 1). The assessor searches primarily for information relevant to Alaskan  
131 populations but expands the search to include other populations when information on Alaskan  
132 populations is insufficient to assign a score. A second assessor reviews the account and conducts  
133 an assessment without consulting the scores of the first assessor. If assessors disagree on a score,  
134 they discuss the question and consult additional sources. The assessment is then sent to a  
135 taxonomic expert for external review (Fig. 1). Once the review is complete, assessors update scores  
136 following the expert's recommendation and finalize the assessment. Species' accounts, along with  
137 related conservation resources, are published online where they are publicly available (Fig. 1).

### 138 **NatureServe Conservation Status Assessments**

139           NatureServe sub-national ranks (S ranks) are calculated by assessing a species' Rarity,  
140 Population Trends, and Threats (Master et al. 2012). Criteria for Rarity include population size,  
141 range extent, area of occupancy, and the ecological integrity of known habitat. Population Trends  
142 consider short- and long-term trends. Finally, Threats are assessed by evaluating their scope  
143 (percent of population affected), severity (within the scope, percent of population reduction), and  
144 timing. An overall threat impact score is calculated using severity and scope scores across all the  
145 threats that were identified (Master et al. 2012).

146           S ranks range from 1 to 5. A rank of S1 indicates that the species is critically imperiled in  
147 that subnational jurisdiction (typically a state or province). A rank of S5 indicates that the species  
148 is secure in that subnational jurisdiction. A range rank (e.g., S3S4) indicates that the status of the  
149 species is uncertain within the bounds of the two values. Because the ASRS and NatureServe  
150 ranking systems use similar criteria, we used information from the ASRS species' accounts to

151 update the S ranks of the 36 small mammal species. Scientific literature and expert opinion  
152 informed the Threats assessments, which are not included in the ASRS (see next section).

## 153 **Identifying Conservation Actions and Research Priorities Using Expert**

### 154 **Opinion**

155 In 2019, we surveyed taxonomic experts to obtain their judgment on the most important  
156 conservation actions, research priorities, and threats facing 5 species: *Glaucomys sabrinus*,  
157 *Marmota broweri*, *Myotis lucifugus*, *Ochotona collaris*, and *Synaptomys borealis*. Each of the  
158 selected species are of high conservation concern (ADF&G 2015; this paper) and have been the  
159 topic of dedicated research projects in the state. For each species, we identified 3 to 7 experts. We  
160 defined an expert as a scientist who was directly involved in a research project investigating the  
161 species in Alaska.

162 Using an online survey tool, we asked experts a series of 7 questions (Table 1; Droghini et  
163 al. 2020). Answers to the first 5 survey questions informed the evaluation of threats for the 5  
164 selected species and species with similar ecologies. The last 2 questions asked experts to identify  
165 conservation actions to mitigate threats and identify the most critical research needs if they were  
166 responsible for allocating a large sum of money (US \$10 million) to research activities (Table 1).

## 167 **RESULTS**

168 We evaluated the conservation status of 36 small mammal species across 4 orders and 7  
169 families. Assessments from both the ASRS and NatureServe ranking systems are available online  
170 (Droghini et al. 2020). Relative to Alaska's species diversity, we assessed 19 out of 23 Rodentia  
171 species, all Lagomorpha species ( $n = 3$ ), all Eulipotyphla species ( $n = 9$ ), and 5 out of 7 Chiroptera  
172 species. Four species are endemic to Alaska: *Lepus othus*, *Marmota broweri*, *Sorex jacksoni*, and  
173 *S. pribilofensis*. *Sorex jacksoni* and *Sorex pribilofensis* are endemic to the island of Saint Lawrence



174 and Saint Paul, respectively; *L. othus* and *M. broweri* are more widespread. The taxonomy of *L.*  
175 *othus* and *S. jacksoni*, as well as *Myotis evotis*, are the subject of ongoing research (Waltari and  
176 Cook 2005; Hope et al. 2012; Cason et al. 2016; Lausen et al. 2019). Our focus was to assess the  
177 conservation status of species over which the state of Alaska has significant stewardship. The  
178 species we did not assess either have very restricted ranges in Alaska (e.g. *Zapus princeps*) or are  
179 not typically considered small mammals (e.g. *Castor canadensis*).

## 180 **Overall Status Ranks by ASRS and NatureServe**

181 The highest rank obtained by a small mammal species in the ASRS was Orange IV. Orange  
182 IV indicates unknown Trends, high Biological Vulnerability, and high Action Needs (Gotthardt et  
183 al. 2012) and is the highest assignable rank for species that have unknown population and  
184 distribution trends. We assigned 7 species the rank of Orange IV: 3 species endemic to Alaska  
185 (*Marmota broweri*, *Sorex jacksoni*, and *S. pribilofensis*) and 4 Chiroptera species largely restricted  
186 to Southeast Alaska (*Lasionycteris noctivagans*, *Myotis californicus*, *M. evotis*, and *M. volans*).  
187 Under the NatureServe system, these 7 species received similar ranks of high concern relative to  
188 other species (Droghini et al. 2020). Specifically, *Marmota broweri*, *Sorex jacksoni*, and *S.*  
189 *pribilofensis* received a rank of S3 (vulnerable) when assessed using the NatureServe  
190 methodology; this rank was the highest rank obtained by the species we assessed.

191 Most species ( $n = 24$ ) in the ASRS, including most Rodentia species ( $n = 14$ ) and  
192 Eulipotyphla species ( $n = 7$ ), ranked as Orange V, defined as unknown Trends and either high  
193 Biological Vulnerability or high Action Needs (Gotthardt et al. 2012). All Orange V species scored  
194 low on Biological Vulnerability and high on Action Needs. Two of the highest ranked species  
195 according to NatureServe, *Myotis lucifugus* (S3, vulnerable) and *Ochotona collaris* (S3S4,  
196 vulnerable/apparently secure), were in this category.

197 Fifty percent of species received a rank of S5 (secure) under the NatureServe criteria, which  
198 indicates lowest concern (Droghini et al. 2020). We assigned Blue only to *Lepus americanus*,  
199 *Myodes rutilus*, and *Tamiasciurus hudsonicus* because they had low Biological Vulnerability and  
200 low Action Needs scores.

## 201 **ASRS Theme Scores**

### 202 Population and Distribution Trends

203 The median score for both questions in Trends was 0, indicating unknown trends. All 36  
204 species had unknown population trends, while 33 species had unknown distribution trends.  
205 Distributions of *Lepus americanus*, *Marmota monax*, and *Synaptomys borealis* are known or  
206 suspected to have expanded in Alaska over the past fifty years (Tape et al. 2016; A. Baltensperger,  
207 pers. comm.; L.E. Olson, pers. comm.).

### 208 Biological Vulnerability

209 The median score for Biological Vulnerability was -32, out of a possible minimum of -50.  
210 When grouped by order, median scores for Eulipotyphla, Rodentia, and Lagomorpha were low  
211 (range: -36 to -32). The median score for Chiroptera was -7, which we consider high. Top-ranking  
212 species for Biological Vulnerability were *Sorex pribilofensis* (theme score = 14), *S. jacksoni* (8),  
213 and *Myotis volans* (3).

214 Median scores for range size and number of aggregation sites were the lowest possible  
215 scores, indicating that most small mammal species are widespread in Alaska (Fig. 2). Variability  
216 in scores for these questions was minimal and characterized by the presence of outliers. The  
217 median score for population size was -6 (Fig. 2), which is selected if the population size is  
218 unknown but suspected to be large (i.e., more than 10,000 individuals; Gotthardt et al. 2012).  
219 Median scores for dietary specialization and habitat specialization were 1; because these questions

220 are assessed on 3-point scales, a value of 1 indicates moderate specialization (Fig. 2). No species  
221 was assessed to have high dietary specialization and few species were assessed to have high habitat  
222 specialization (Fig. 2).

### 223 Management and Conservation Action Needs

224 No species obtained partial scores for any questions in Action Needs. The median score  
225 for Action Needs was 24. When grouped by order, Eulipotyphla had the highest median score (32)  
226 while Lagomorpha had the lowest (4). Two species received a score of 40, which is the maximum  
227 possible score for Action Needs: *Sorex minutissimus* and *S. navigator*. Most species had high  
228 management needs, indicating that they are not subject to direct management actions, and high  
229 monitoring needs, indicating that their population trends are not consistently or extensively  
230 monitored (Fig. 3). Species with moderate monitoring needs belonged to one of two families:  
231 Vespertilionidae or Leporidae. These species are monitored by state agencies, but data are  
232 inadequate to detect trends.

233 Nearly all species ( $n = 32$ ) had high or moderate inventory needs; thus, knowledge of range  
234 limits and habitat associations remains incomplete (Fig. 3). The species with low inventory needs  
235 were *Lepus americanus*, *Myodes rutilus*, *Peromyscus keeni*, and *Tamiasciurus hudsonicus*. These  
236 species are widespread, common, and easy to detect or capture in traps.

237 Twenty-three species (64%) had high research needs, reflecting a lack of information on  
238 the factors that limit populations. These species included all species endemic to Alaska, all  
239 Eulipotyphla, and all Chiroptera with the exception of *Myotis lucifugus*.

### 240 **NatureServe Threats Assessments**

241 Two-thirds of the species we assessed ( $n = 24$ ) received a low threat impact score. Non-  
242 native disease (i.e., white-nose syndrome) was listed as a threat for all Chiroptera species, though

243 impact scores varied by species and ranged from very high to medium-low (Droghini et al. 2020).  
244 We considered timber harvest to be a medium-low threat for Chiroptera species largely restricted  
245 to Southeast Alaska. We considered habitat alteration due to climate change a high-medium threat  
246 for talus specialists. *Sorex jacksoni* and *S. pribilofensis* received an impact score of high-low; this  
247 score reflects the potentially large, but highly uncertain effects of disturbances on narrowly  
248 endemic species.

249 Experts tended to disagree about the severity or scope of threats, which is reflected for  
250 some species as ranges in the overall impact scores (Droghini et al. 2020). Experts also disagreed  
251 about the timing of climate change related threats, both within and across species, reflecting  
252 uncertainty as to whether effects would be expressed in the short- or long-term (Droghini et al.  
253 2020).

## 254 **Recommended Conservation Actions and Research Priorities**

255 We received 23 completed surveys: 5 per species with the exception of *Synaptomys*  
256 *borealis*, for which we were able to identify only 3 experts. The most commonly suggested  
257 conservation actions to mitigate threats were to collect more information and to protect known  
258 habitat. When asked to allocate US \$10 million to different research topics, experts considered  
259 monitoring of population trends, research on genetic diversity and adaptive capacity, and habitat  
260 modeling important for all species, with \$2 to \$3 million devoted to each topic (Fig. 4). They  
261 considered research on response to climate change important for *Marmota broweri* and *Ochotona*  
262 *collaris*, while research on response to human development and deforestation was important for  
263 *Glaucomys sabrinus*, *Myotis lucifugus*, *Synaptomys borealis*. Research on introduced species and  
264 on diseases or parasites was judged to warrant comparably little funding (Fig. 4).

## 265 **DISCUSSION**

266           The Alaska Species Ranking System (ASRS) explicitly identifies key information needs  
267 by assessing the strength of conservation actions around inventory, monitoring, and research. More  
268 than 2/3 of small mammal species in Alaska are of high conservation concern in the ASRS, a result  
269 driven largely by the lack of information about species' population trends, distributional limits,  
270 and population ecology. The prevalence of data deficiencies for small mammals is not unique to  
271 Alaska: relative to other mammal groups, a large proportion of small mammal species are listed as  
272 data-deficient by the IUCN but are likely threatened (Jetz & Freckleton 2015).

273           Species of the orders Chiroptera and Eulipotyphla and species endemic to Alaska were of  
274 particularly high conservation concern. Chiroptera species have low reproductive rates and  
275 specific habitat requirements for roosting and hibernating; several Chiroptera species also have  
276 narrow dietary niches (Safi and Kerth 2004; Boyles and Storm 2007). These traits may contribute  
277 to increased extirpation risk (Safi and Kerth 2004; Boyles and Storm 2007). In fact, Chiroptera has  
278 experienced a high number of recent extinctions relative to other orders (Ceballos & Brown 1995).  
279 All Eulipotyphla species in Alaska received very high Action Need scores in the ASRS; the recent  
280 discovery of a species new to Alaska (Dokuchaev 1997; now recognized as *Sorex minutissimus*)  
281 and important taxonomic revisions (Hope et al. 2012; Woodman 2018) provide further evidence  
282 of high information needs for Eulipotyphla species in Alaska. Data deficiencies in Eulipotyphla  
283 also exist at a global scale, despite high levels of diversity and extinction relative to other  
284 mammalian orders (Jetz and Freckleton 2015; Verde Arregoitia 2016). Two Eulipotyphla species,  
285 *Sorex jacksoni* and *S. pribilofensis*, were the highest-ranked species in both the ASRS and  
286 NatureServe. Their ranges are restricted to single islands in the Bering Sea; narrowly endemic

287 species have greater risk of extinction due to small population sizes, small range sizes, and  
288 demographic stochasticity (Hartley and Kunin 2003; Cardillo et al. 2008).

289

290 In general, the ASRS and NatureServe ranking systems agreed on the rankings of species  
291 in the highest and lowest risk categories. However, most species that were of intermediate concern  
292 by the ASRS were ranked of lowest conservation concern by NatureServe. Both ranking systems  
293 recognize these species' low biological vulnerabilities: these species are relatively widespread,  
294 presumed common, and have life history traits and ecological preferences that correlate with low  
295 extirpation risk. The divergence in conservation ranks largely reflects the importance that the  
296 ASRS ascribes towards information needs and data deficiencies; in the NatureServe ranking  
297 system, data deficiencies do not weight the score towards greater conservation concern.

## 298 **Threats to Small Mammals in Alaska**

299 We assessed most small mammal species as having low threat impact scores. Talus  
300 specialists and Chiroptera species severely affected by white-nose syndrome received the highest  
301 impact scores. In the eastern U.S., populations of *Myotis lucifugus* and *M. septentrionalis* (a close  
302 relative of *M. evotis*) declined by over 80% after being infected by *Pseudogymnoascus destructans*,  
303 the fungus that causes white-nose syndrome (Langwig et al. 2015). The disease was detected in  
304 the western U.S. for the first time in 2016; the taxonomic experts we surveyed expressed  
305 uncertainty about the timing of white-nose syndrome (i.e., when it would arrive in Alaska), but  
306 predicted strong negative effects to *M. lucifugus*. Based on our literature review, we do not expect  
307 other Chiroptera species in Alaska to experience similar population declines from white-nose  
308 syndrome.

309 Talus specialists such as *Marmota broweri* and *Ochotona collaris* occupy habitats that are  
310 considered vulnerable to climate change; resulting changes in temperature, snow conditions, and  
311 vegetation are expected to affect several aspects of these species' biology and ecology, including  
312 their distribution, thermoregulation, diet, and dispersal (COSEWIC 2011; Hope et al. 2015;  
313 Berteaux et al. 2017). At the same time, experts in our survey expressed high uncertainty about  
314 the severity, scope, and timing of climate-related threats. It may be possible for talus specialists to  
315 adapt and persist by following the movement of alpine plant communities to higher elevations or  
316 areas of glacial melt; this spatial shift has been observed in talus specialists in the contiguous  
317 United States (Beever et al. 2011). Tundra-adapted species (e.g., *Dicrostonyx groenlandicus*,  
318 *Microtus miurus*) may also be threatened by climate change (Lanier et al. 2015; Colella et al.  
319 2020). Unlike talus specialists, which have restricted distributions, tundra-adapted species in  
320 Alaska are widespread and often occupy a range of habitats within the broader tundra ecosystem.  
321 Moreover, distribution models for these species disagree about the magnitude and direction of  
322 climate change effects (Baltensperger and Huettmann 2015; Hope et al. 2015). Thus, for tundra-  
323 adapted species, we assumed that the geographic scope of habitat loss due to climate change would  
324 affect no more than 30% of the population, and, where habitat loss occurred, it would result in no  
325 more than a 30% decline in population. Assumed reductions resulted in a low impact score under  
326 the NatureServe methodology (Master et al. 2012). If we were to increase the geographic scope or  
327 severity of these threats, the status of these species would increase from S5 (secure) to S4  
328 (apparently secure) in the NatureServe ranking system. ASRS ranks would be unaffected because  
329 the ASRS does not include criteria related to threats.

## 330 **Recommendations for Conservation Actions and Research Priorities**

331           Effective conservation and management requires accurate knowledge of species' biology,  
332 ecology, and taxonomy (Entwistle & Stephenson 2000). For most small mammal species in  
333 Alaska, our understanding of these aspects is severely limited. Indeed, the experts we surveyed  
334 identified a need to collect more information for 4 of the 5 species they evaluated. Incomplete  
335 knowledge of species' biology and ecology may lead to incorrect assessments of extirpation risk,  
336 and it limits our ability to predict and mitigate the effects of threats. For example, predicting  
337 responses to climate change, which experts identified as a research priority, requires a  
338 comprehensive understanding of the species of interest, including their ecological requirements,  
339 dispersal potential, genetic variability, and phenotypic plasticity (COSEWIC 2011; Colella et al.  
340 2020). Experts selected many of these topics as research priorities.

341           We identified a vital need to monitor population and distribution trends, which were  
342 unknown or uncertain for nearly all species that we assessed. Most small mammals in Alaska are  
343 not monitored annually by government agencies. Consequently, the monitoring that is conducted  
344 is typically highly localized or only supported for a few years. While preferable to the absence of  
345 any monitoring effort, sporadic and isolated monitoring efforts cannot provide robust data on  
346 statewide population trends, which require long-term and extensive investments. Although funding  
347 for small mammal research is limited, we believe there is considerable potential to develop  
348 research programs that address data deficiencies while benefiting existing priority species.  
349 Documenting changes in the abundance of small mammals provides valuable insights on the  
350 transmission of human diseases and on the ecology of threatened and harvested species such as  
351 carnivores, raptors, and waterfowl (e.g., Bêty et al. 2002; Ecke et al. 2017; Schmidt et al. 2018).



352 The value of monitoring small mammal species clearly extends beyond the target species, though  
353 this fact is not often recognized by funding agencies or the public.

354

355 Small mammals play important ecological roles as herbivores, seed dispersers, and prey.  
356 In Alaska, the paucity of data on population size, distribution trends, and basic ecology hinders  
357 our ability to assess the health of small mammal populations, including endemic species.  
358 Addressing existing data gaps will enable more robust assessments of conservation status for small  
359 mammal species and is critical given the rapid pace of climate change and related ecosystems  
360 effects.

361

## 362 **ACKNOWLEDGMENTS**

363 We would like to thank the scientists that reviewed the ASRS assessments: A.  
364 Baltensperger, K. Blejwas, C. Brandt, A. Gunderson, A. Hope, H. Lanier, L. Olson, and J. Reimer.  
365 The following experts participated in the survey: V. Bakker, A. Baltensperger, A. Bidlack, K.  
366 Blejwas, D. Causey, E. Flaherty, J. Hagelin, H. Lanier, T. Lee, S. Morrison, T. Mullet, L. Olson,  
367 V. Patil, S. Pyare, J. Reimer, K. Rubin, P. Schuette, R. Shively, and W. Smith. T.L. Fields, T.A.  
368 Gotthardt, and K.M. Walton made important contributions to earlier versions of the ASRS. M.L.  
369 Carlson and T.W. Nawrocki provided valuable feedback on the manuscript. The Alaska  
370 Department of Fish and Game and the University of Alaska Anchorage provided financial support  
371 for this project.

372 **LITERATURE CITED**

373 Alaska Department of Fish and Game (ADF&G). 2015. Alaska Wildlife Action Plan.  
374 Juneau, AK, USA.

375 Baltensperger AP, Huettmann F. 2015. Predicted shifts in small mammal distributions and  
376 biodiversity in the altered future environment of Alaska: An open access data and machine learning  
377 perspective. PLoS ONE DOI: 10.1371/journal.pone.0132054

378 Beaver EA, Ray C, Wilkening JL, Brussard PF, Mote PW. 2011. Contemporary climate  
379 change alters the pace and drivers of extinction. *Global Change Biology* **17**:2054–2070.

380 Berteaux D, Gauthier G, Domine F, Ims RA, Lamoureux SF, Lévesque E, Yoccoz N. 2017.  
381 Effects of changing permafrost and snow conditions on tundra wildlife: critical places and times.  
382 *Arctic Science* **3**:65–90.

383 Bêty J, Gauthier G, Korpimäki E, Giroux J-F. 2002. Shared predators and indirect trophic  
384 interactions: Lemming cycles and arctic-nesting geese. *Journal of Animal Ecology* **71**:88–98.

385 Boyles JG, Storm JJ. 2007. The perils of picky eating: Dietary breadth is related to  
386 extinction risk in insectivorous bats. PLoS ONE DOI: 10.1371/journal.pone.0000672.

387 Breininger DR, Barkaszi MJ, Smith RB, Oddy DM, Provanha JA. 1998. Prioritizing  
388 wildlife taxa for biological diversity conservation at the local scale. *Environmental Management*  
389 **22**:315–321.

390 Cardillo M, Mace GM, Gittleman JL, Jones KE, Bielby J, Purvis A. 2008. The  
391 predictability of extinction: Biological and external correlates of decline in mammals. *Proceedings*  
392 *of the Royal Society B: Biological Sciences* **275**:1441–1448.

393 Cason MM, Baltensperger AP, Booms TL, Burns JJ, Olson LE. 2016. Revised distribution  
394 of an Alaskan endemic, the Alaska Hare (*Lepus othus*), with implications for taxonomy,  
395 biogeography, and climate change. *Arctic Science* **2**:50–66.

396 Ceballos G, Brown JH. 1995. Global patterns of mammalian diversity, endemism, and  
397 endangerment. *Conservation Biology* **9**:559–568.

398 Chapin FS et al. 2010. Resilience of Alaska’s boreal forest to climatic change. *Canadian*  
399 *Journal of Forest Research* **40**:1360–1370.

400 Colella JP, Talbot SL, Brochmann C, Taylor EB, Hoberg EP, Cook JA. 2020. Conservation  
401 genomics in a changing Arctic. *Trends in Ecology and Evolution* **35**:149–162.

402 Cook JA, Bidlack AL, Conroy CJ, Demboski JR, Fleming MA, Runck AM, Stone KD,  
403 MacDonald SO. 2001. A phylogeographic perspective on endemism in the Alexander Archipelago  
404 of southeast Alaska. *Biological Conservation* **97**:215–227.

405 COSEWIC. 2011. COSEWIC assessment and status report on the collared pika *Ochotona*  
406 *collaris* in Canada. Committee on the Status of Endangered Wildlife in Canada, Ottawa, ON, CAN.

407 Dokuchaev, N. E. 1997. A new species of shrew (Soricidae, Insectivora) from Alaska.  
408 *Journal of Mammalogy* **78**:811–817.

409 Droghini A, Kelty R, Christie K. 2020. Data from: Conservation status, threats, and  
410 information needs of small mammals in Alaska. The Knowledge Network for Biocomplexity DOI:  
411 10.5063/F1CN72BC.

412 Ecke F, Angeler DG, Magnusson M, Khalil H, Hörnfeldt B. 2017. Dampening of  
413 population cycles in voles affects small mammal community structure, decreases diversity, and  
414 increases prevalence of a zoonotic disease. *Ecology and Evolution* **7**:5331–5342.

415 Entwistle AC, Stephenson PJ. 2000. Small mammals and the conservation agenda. Pages  
416 119–140 in A. C. Entwistle and N. Dunstone, editors. *Priorities for the conservation of mammalian*  
417 *diversity: Has the panda had its day?* Cambridge University Press, Cambridge, UK.

418 Gotthardt TA, Walton KM, Fields TL. 2012. Setting priorities for Alaska’s Wildlife Action  
419 Plan. Alaska Natural Heritage Program, University of Alaska Anchorage, Alaska. Available from  
420 <https://accs.uaa.alaska.edu/publications/> (accessed 5 May 2020).

421 Hartley S, Kunin WE. 2003. Scale dependency of rarity, extinction risk, and conservation  
422 priority. *Conservation Biology* **17**:1559–1570.

423 Hope AG, Speer KA, Demboski JR, Talbot SL, Cook JA. 2012. A climate for speciation:  
424 Rapid spatial diversification within the *Sorex cinereus* complex of shrews. *Molecular*  
425 *Phylogenetics and Evolution* **64**(3):671–684.

426 Hope AG, Waltari E, Malaney JL, Payer DC, Cook JA, Talbot SL. 2015. Arctic  
427 biodiversity: Increasing richness accompanies shrinking refugia for a cold-associated tundra fauna.  
428 *Ecosphere* DOI: 10.1890/ES15-00104.1.

429 IUCN. 2012. IUCN Red List categories and criteria: Version 3.1. Second edition. Gland,  
430 CH and Cambridge, GB.

431 Jetz W, Freckleton RP. 2015. Towards a general framework for predicting threat status of  
432 data-deficient species from phylogenetic, spatial and environmental information. *Philosophical*  
433 *Transactions of the Royal Society B: Biological Sciences* **370**:1–10.

434 Langwig KE, Hoyt JR, Parise KL, Kath J, Kirk D, Frick WF, Foster JT, Marm Kilpatrick  
435 A. 2015. Invasion dynamics of white-nose syndrome fungus, midwestern United States, 2012–  
436 2014. *Emerging Infectious Diseases* **21**:1023–1026.

437 Lanier HC, Gunderson AM, Weksler M, Fedorov VB, Olson LE. 2015. Comparative  
438 phylogeography highlights the double-edged sword of climate change faced by arctic- and alpine-  
439 adapted mammals. PLoS ONE DOI: 10.1371/journal.pone.0118396.

440 Lausen CL, Proctor M, Nagorsen DW, Burles D, Paetkau D, Harmston E, Blejwas K,  
441 Govindarajulu P, Friis L. 2019. Population genetics reveal *Myotis keenii* (Keen's myotis) and  
442 *Myotis evotis* (long-eared myotis) to be a single species. Canadian Journal of Zoology **97**:267–  
443 279.

444 Master LL, Faber-Langendoen D, Bittman R, Hammerson GA, Heidel B, Ramsay L, Snow  
445 K, Teucher A, Tomaino A. 2012. NatureServe conservation status assessments: Factors for  
446 evaluating species and ecosystem risk. Arlington, Virginia.

447 Millsap BA, Gore JA, Runde DE, Cerulean SI. 1990. Setting priorities for the conservation  
448 of fish and wildlife species in Florida. Wildlife Monographs **111**:3–57.

449 Safi K, Kerth G. 2004. A comparative analysis of specialization and extinction risk in  
450 temperate-zone bats. Conservation Biology **18**:1293–1303.

451 Schmidt JH, McIntyre CL, Roland CA, MacCluskie MC, Flamme MJ. 2018. Bottom-up  
452 processes drive reproductive success in an apex predator. Ecology and Evolution **8**:1833–1841.

453 Tape K, Sturm M, Racine C. 2006. The evidence for shrub expansion in Northern Alaska  
454 and the Pan-Arctic. Global Change Biology **12**:686–702.

455 Tape KD, Christie K, Carroll G, O'Donnell JA. 2016. Novel wildlife in the Arctic: The  
456 influence of changing riparian ecosystems and shrub habitat expansion on snowshoe hares. Global  
457 Change Biology **22**:208–219.

458 Verde Arregoitia LD. 2016. Biases, gaps, and opportunities in mammalian extinction risk  
459 research. Mammal Review **46**:17–29.

460 Waltari E, Cook JA. 2005. Hares on ice: Phylogeography and historical demographics of  
461 *Lepus arcticus*, *L. othus*, and *L. timidus* (Mammalia: Lagomorpha). *Molecular Ecology* **14**:3005–  
462 3016.

463 Woodman, N. 2018. American recent Eulipotyphla: Nesophontids, solendons, moles, and  
464 shrews in the New World. Smithsonian Institution Scholarly Press, Washington, D.C., USA.

465 **TABLES**

466 **Table 1.** Questions posed to taxonomic experts to assess threats, conservation actions, and  
467 research priorities for 5 species of high conservation concern in the state of Alaska.

| Questions                                                                                                                 | Description of Answer Choices                 |
|---------------------------------------------------------------------------------------------------------------------------|-----------------------------------------------|
| 1. What is the scope of each threat?*                                                                                     | Percent of population affected                |
| 2. What is the estimated severity of each threat?*                                                                        | Percent of population affected                |
| 3. What is the estimated timing of each threat?*                                                                          | Number of years until onset                   |
| 4. What is the level of uncertainty associated with each threat?                                                          | High, moderate, or low                        |
| 5. If climate change continues unabated, what do you expect will happen to this species' range in Alaska in 50 years?     | Expand, contract, remain the same, or unknown |
| 6. List possible conservation actions that would mitigate threats.                                                        | Open-ended                                    |
| 7. If given a budget of \$10 million for research on this species over a 5-year period, how would you allocate resources? | See Fig. 4 for proposed research themes.      |

468 \* Adapted from the NatureServe Conservation Status Assessments (Master et al. 2012).

469

## 470 **FIGURE LEGENDS**

471 **Figure 1.** The Alaska Species Ranking System is a conservation ranking system for tetrapods in  
472 Alaska. It uses a multi-step process to ensure that assessments are objective, transparent, and  
473 standardized across taxa.

474 **Figure 2.** Boxplots of scores in the Biological Vulnerability theme for 36 small mammal species.  
475 The bottom and top edges of each box represent the first and third quartiles, respectively. The  
476 median is represented by a dark vertical line. Horizontal lines extend no further than 1.5 times the  
477 interquartile range. Data points beyond this range are depicted by solid circles. Criteria with an  
478 asterisk are evaluated on a scale that ranges from -5 to +5; all other criteria are evaluated on a scale  
479 ranging from -10 to +10. Conservation concern increases with numeric value.

480 **Figure 3.** Distribution of ASRS scores for the 4 questions that compose the Action Needs theme.  
481 All questions were evaluated on a 3-point scale ranging from -10 to +10; no partial scores were  
482 awarded. Conservation concern increases with numeric value.

483 **Figure 4.** Responses to survey question asking respondents to allocate money to different research  
484 topics if given a total budget of \$10 million per species. Pie slices represent the proportion of the  
485 budget agreed upon by  $\geq 50\%$  of respondents. When there was no consensus among respondents,  
486 the median value was used.



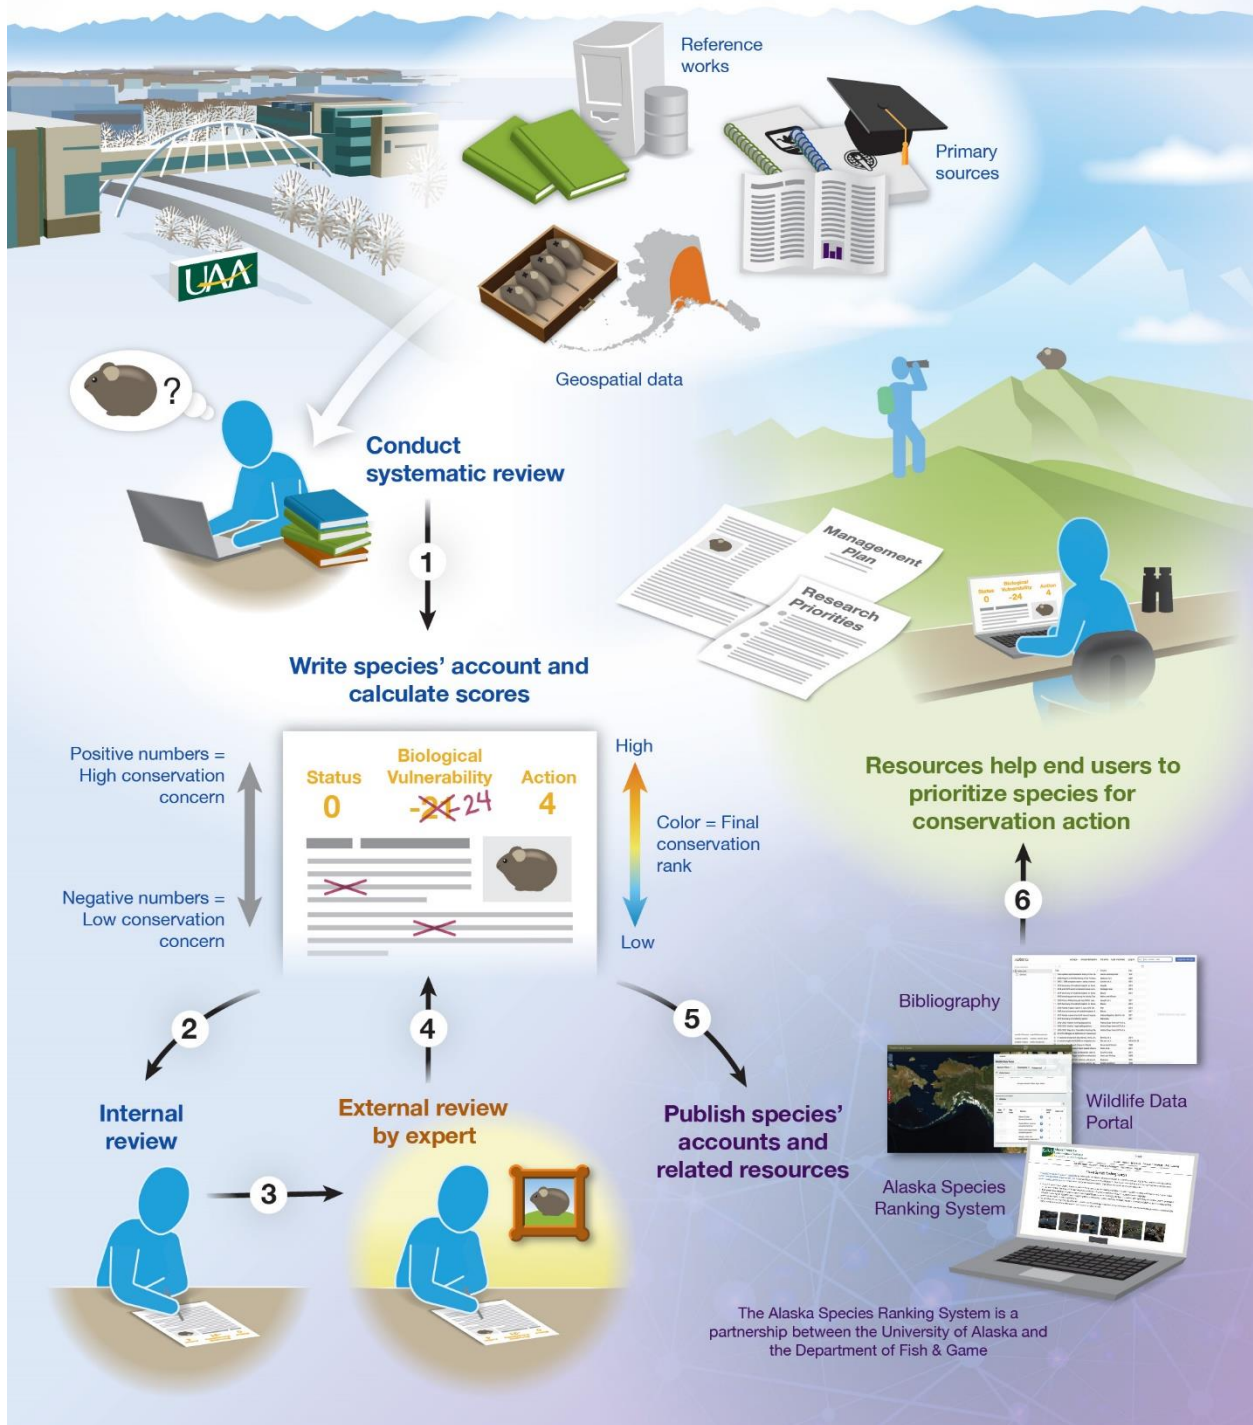

487

488 **Fig. 1.** The Alaska Species Ranking System is a conservation ranking system for tetrapods in  
 489 Alaska. It uses a multi-step process to ensure that assessments are objective, transparent, and  
 490 standardized across taxa.

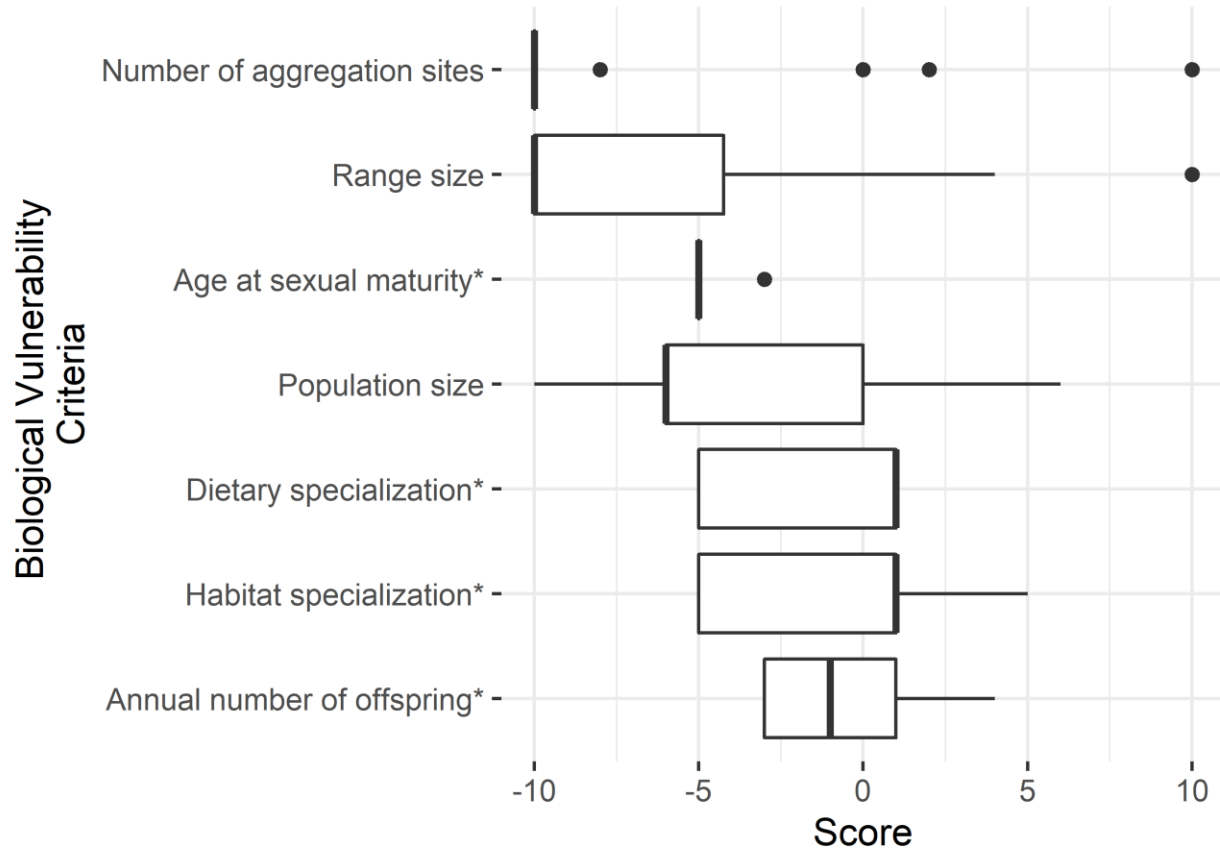

491 **Fig. 2.** Boxplots of scores in the Biological Vulnerability theme for 36 small mammal species. The  
492 bottom and top edges of each box represent the first and third quartiles, respectively. The median  
493 is represented by a dark vertical line. Horizontal lines extend no further than 1.5 times the  
494 interquartile range. Data points beyond this range are depicted by solid circles. Criteria with an  
495 asterisk are evaluated on a scale that ranges from -5 to +5; all other criteria are evaluated on a scale  
496 ranging from -10 to +10. Conservation concern increases with numeric value.

497

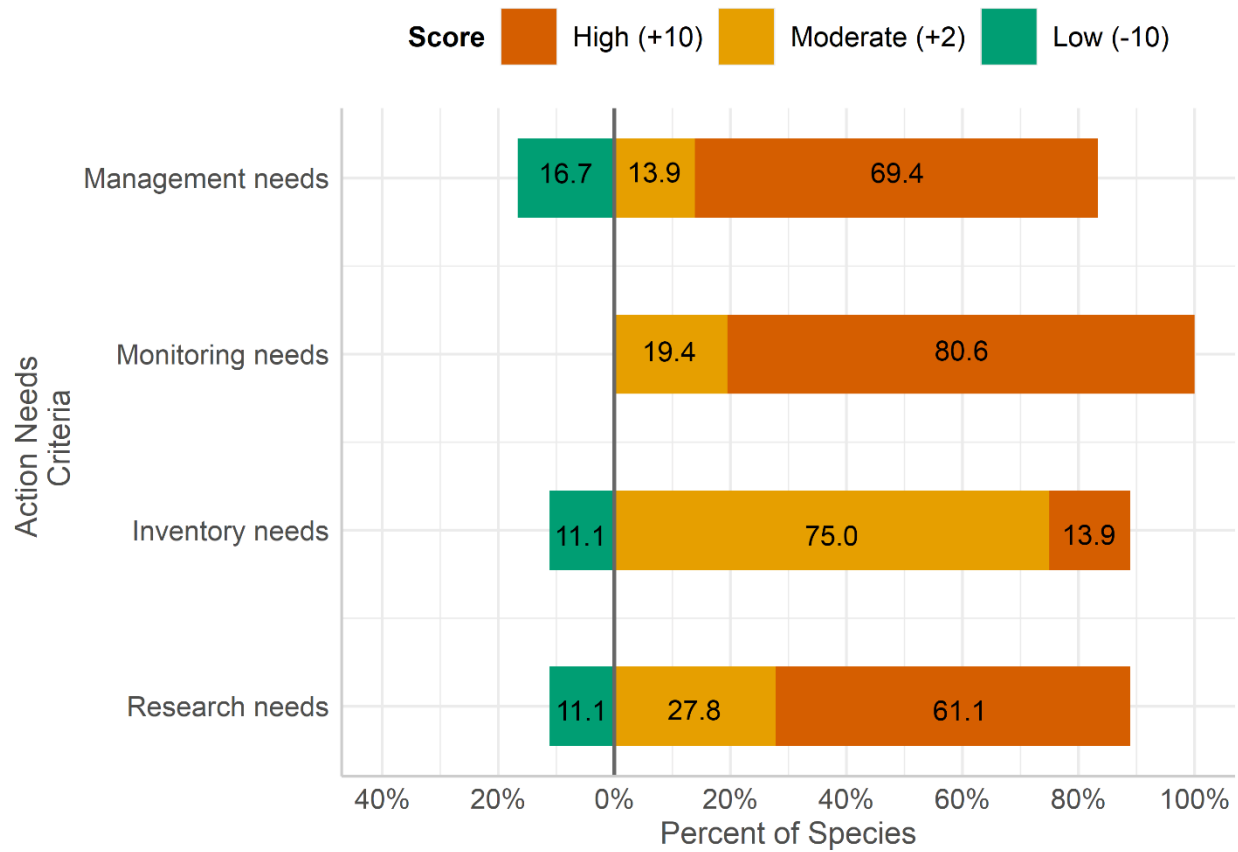

498 **Fig. 3.** Distribution of ASRS scores for the 4 questions that compose the Action Needs theme. All  
499 questions were evaluated on a 3-point scale ranging from -10 to +10; no partial scores were  
500 awarded. Conservation concern increases with numeric value.

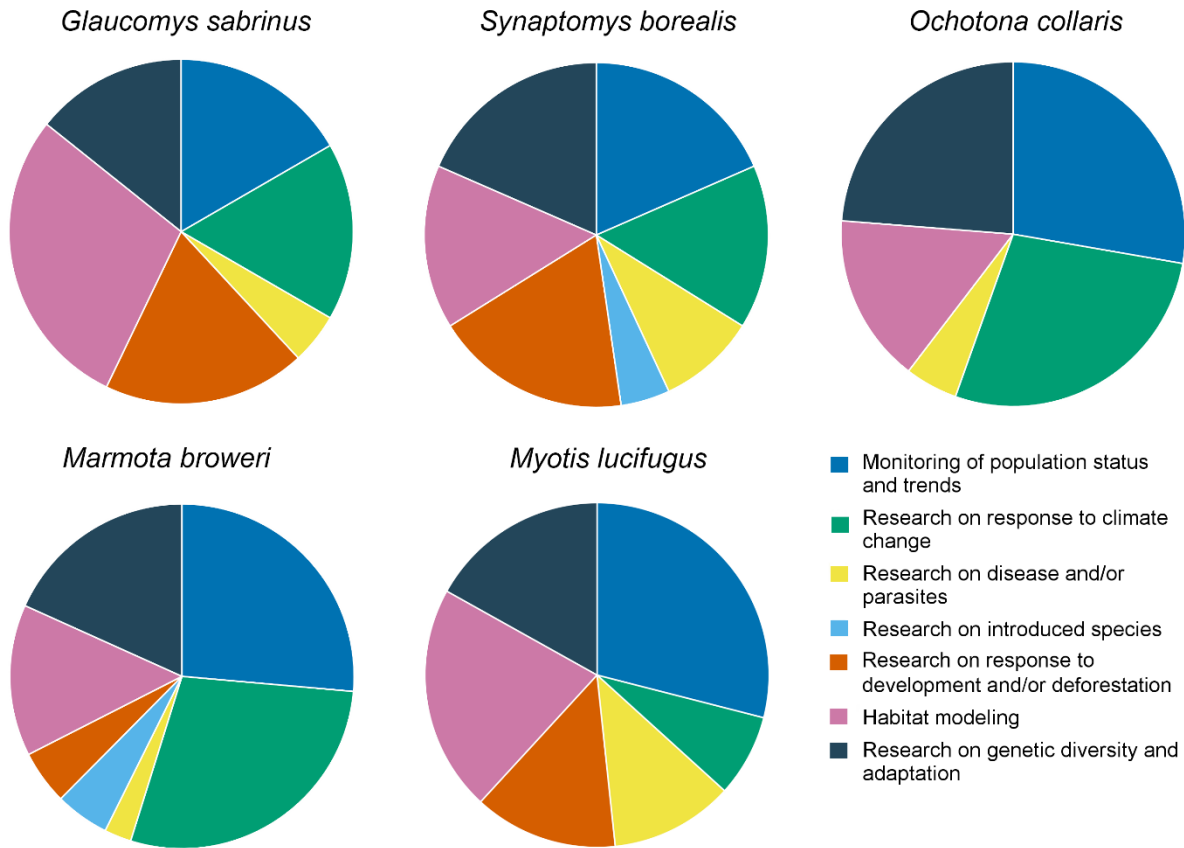

501

502 **Fig. 4.** Responses to survey question asking respondents to allocate money to different research

503 topics if given a total budget of \$10 million per species. Pie slices represent the proportion of the

504 budget agreed upon by  $\geq 50\%$  of respondents. When there was no consensus among respondents,

505 the median value was used.
